# Supplementary material for: Exome Sequencing of Only Seven Qataris Identifies Potentially Deleterious Variants in the Qatari Population
Source: PubMed Central journal article supplement (PMC3490971; doi:10.1371/journal.pone.0047614), 2012-11-06
Supplement: pone.0047614.s002.pdf [file pone.0047614.s002.pdf]

**Figure S2.** Population structure analysis of 1,092 genomes from 4 continents (Table S3) using 48 SNPs designed for assigning Qatari to Q1, Q2, Q3 population clusters (Table S1). Shown is a plot of individual admixture component identified using STRUCTURE [2] with  $k=3$ . Individuals are sorted from left to right by population. Colors correspond to the major ancestry component within the three major groups: European (red), Asian (green), African (blue).

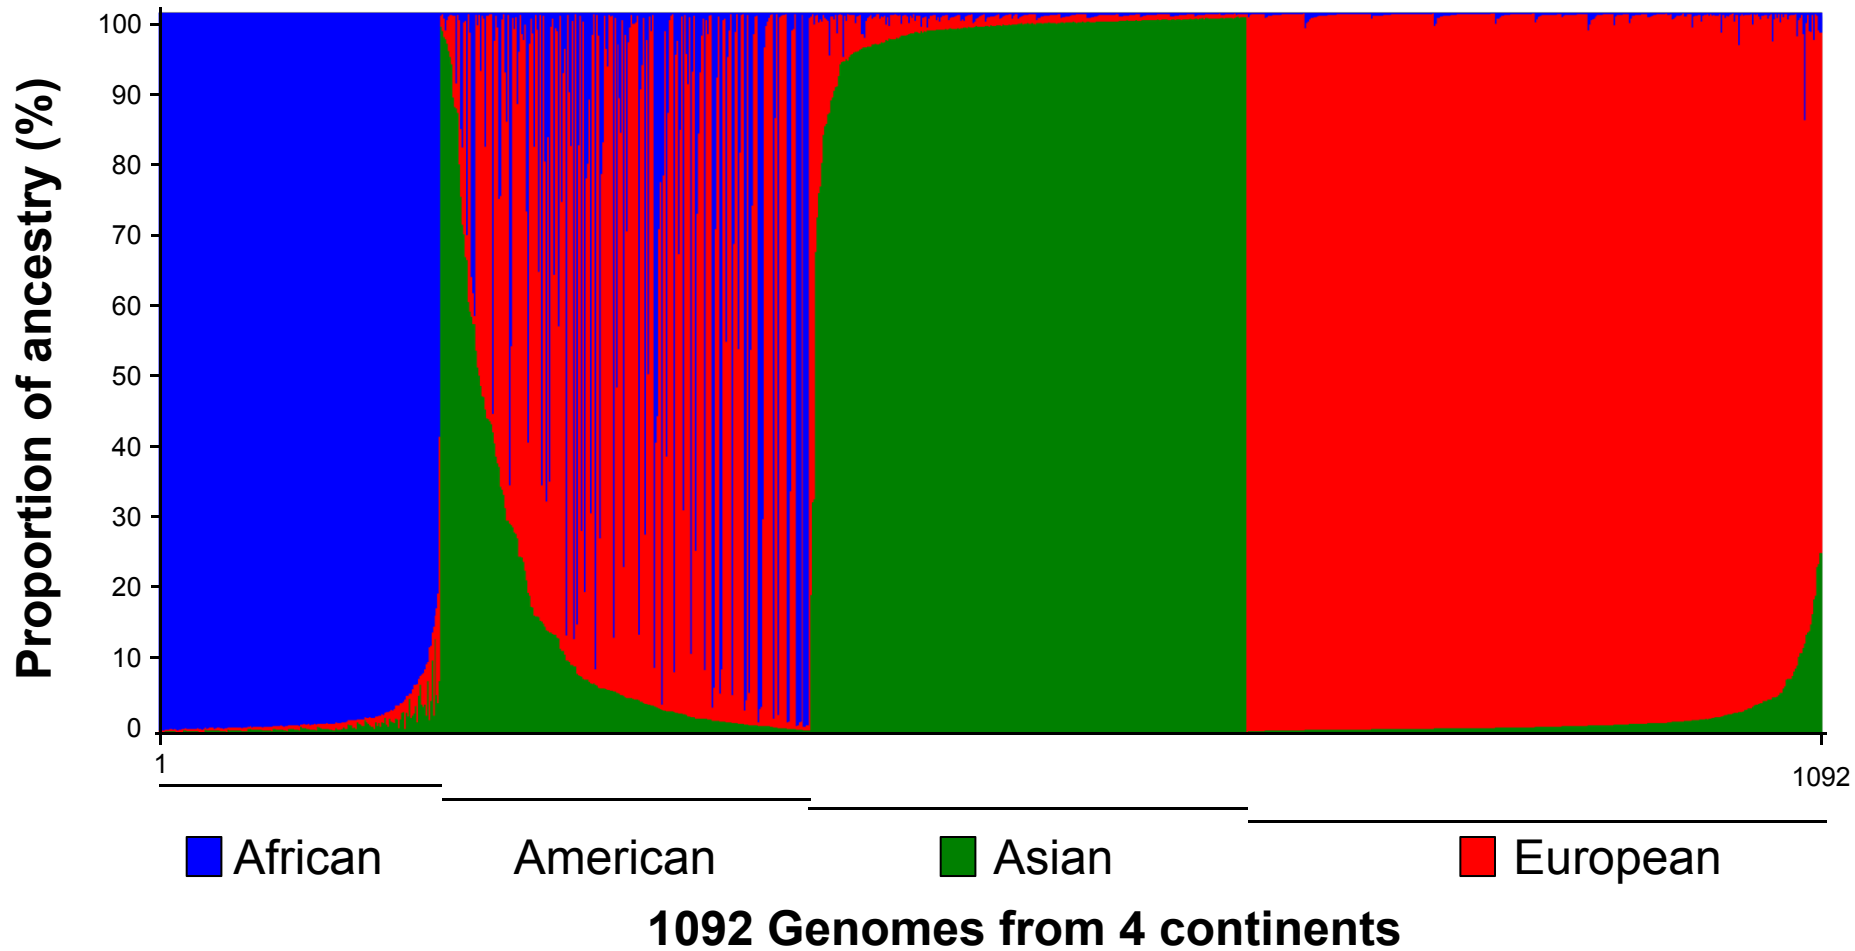

Figure S2
