# Supplementary material for: Exome Sequencing of Only Seven Qataris Identifies Potentially Deleterious Variants in the Qatari Population
Source: PubMed Central journal article supplement (PMC3490971; doi:10.1371/journal.pone.0047614), 2012-11-06
Supplement: pone.0047614.s003.pdf [file pone.0047614.s003.pdf]

**Table S1. SNPs Used to Identify the 3 Qatari Genetic Subpopulations<sup>1</sup>**

| Chromosome | Pos       | dbSNP      | Ref | Function       | Taq Man Assay  | Strand | Alleles |
|------------|-----------|------------|-----|----------------|----------------|--------|---------|
| 1          | 9427796   | rs11121390 | G   | untranslated-3 | C__32056208_10 | +      | G/T     |
| 1          | 13837629  | rs2940305  | C   | intron         | C__1556667_10  | +      | A/C     |
| 1          | 36107510  | rs676614   | C   | near-gene-5    | C__11182717_10 | -      | G/T     |
| 1          | 158887208 | rs2106096  | C   | unknown        | C__11334336_10 | +      | C/T     |
| 1          | 192919045 | rs842806   | A   | unknown        | C__8351682_20  | -      | G/T     |
| 1          | 192925329 | rs842784   | C   | unknown        | C__8343722_10  | +      | C/T     |
| 1          | 192927694 | rs842789   | T   | unknown        | C__8348330_10  | +      | C/T     |
| 1          | 192933397 | rs1769061  | T   | unknown        | C__26369579_20 | -      | G/T     |
| 1          | 225665694 | rs6676201  | T   | unknown        | C__11575560_10 | +      | A/T     |
| 1          | 225716241 | rs7555139  | G   | intron         | C__27148584_10 | +      | A/G     |
| 1          | 225812911 | rs2639703  | T   | intron         | C__27148635_10 | +      | C/T     |
| 1          | 226013355 | rs1877724  | C   | intron         | C__11638771_1_ | +      | C/T     |
| 2          | 6193597   | rs6756093  | C   | unknown        | C__29413282_10 | +      | A/C     |
| 2          | 55210856  | rs2588515  | C   | intron         | C__2128452_20  | +      | C/T     |
| 2          | 123327772 | rs17008070 | T   | unknown        | C__34110098_10 | +      | A/T     |
| 2          | 136910273 | rs6715785  | G   | unknown        | C__29452825_10 | +      | A/G     |
| 2          | 217920510 | rs10198784 | A   | unknown        | C__1385324_20  | +      | A/G     |
| 2          | 223843894 | rs10189760 | T   | unknown        | C__2124265_10  | +      | C/T     |
| 3          | 123404803 | rs820372   | T   | intron         | C__9532967_10  | -      | A/G     |
| 3          | 169990410 | rs2140825  | T   | intron         | C__15826452_10 | -      | A/G     |
| 3          | 179084046 | rs7355960  | C   | intron         | C__31058555_10 | +      | C/T     |
| 4          | 1334721   | rs13117476 | T   | unknown        | C__11282330_10 | +      | C/T     |
| 4          | 106145430 | rs7700148  | G   | intron         | C__33251969_10 | +      | A/G     |
| 4          | 106158216 | rs3796927  | G   | coding-synon   | C__25743542_10 | -      | A/G     |
| 4          | 156124543 | rs2880416  | C   | unknown        | C__16080280_10 | -      | C/G     |
| 5          | 36359911  | rs7731311  | A   | unknown        | C__29995760_10 | +      | A/C     |
| 5          | 122032238 | rs17149518 | G   | unknown        | C__33152018_10 | +      | A/G     |
| 6          | 3887339   | rs9328202  | C   | unknown        | C__30190362_10 | +      | A/C     |
| 6          | 22017738  | rs1928168  | T   | unknown        | C__1416263_10  | -      | A/G     |
| 6          | 102159413 | rs17062374 | G   | intron         | C__34743744_20 | +      | A/G     |

**Table S1. SNPs Used to Identify the 3 Qatari Genetic Subpopulations<sup>1</sup> (Cont. page 2)**

| Chromosome | Pos       | dbSNP      | Ref | Function | Taq Man Assay  | Strand | Alleles |
|------------|-----------|------------|-----|----------|----------------|--------|---------|
| 6          | 151373655 | rs9371491  | A   | intron   | C__30326028_10 | +      | A/T     |
| 6          | 170374026 | rs9460193  | C   | unknown  | C__1466724_10  | +      | C/T     |
| 7          | 99240179  | rs10242455 | A   | unknown  | C__29897826_10 | +      | A/G     |
| 7          | 103538402 | rs3905915  | G   | intron   | C__7594821_10  | +      | A/G     |
| 9          | 19646677  | rs10118808 | C   | intron   | C__30477469_10 | +      | C/G     |
| 11         | 21025805  | rs1400383  | T   | intron   | C__8887269_10  | +      | A/T     |
| 11         | 34772501  | rs7952315  | T   | unknown  | C__1570642_10  | +      | A/T     |
| 11         | 113049287 | rs7111410  | C   | intron   | C__29205300_10 | +      | C/T     |
| 11         | 124653926 | rs10466604 | G   | intron   | C__1326067_10  | +      | C/G     |
| 12         | 20009179  | rs1003189  | C   | unknown  | C__26096839_10 | +      | C/T     |
| 13         | 22647445  | rs1885895  | C   | unknown  | C__11407211_20 | +      | C/T     |
| 13         | 72387833  | rs9564847  | T   | intron   | C__32086731_10 | +      | A/T     |
| 13         | 81562924  | rs4536348  | T   | unknown  | C__72576_10    | +      | C/T     |
| 15         | 72552243  | rs16956634 | G   | intron   | C__32662022_10 | +      | C/G     |
| 15         | 72595571  | rs12914971 | A   | intron   | C__2900798_10  | +      | A/T     |
| 15         | 72600493  | rs2959925  | A   | intron   | C__2900791_10  | -      | A/C     |
| 16         | 6604090   | rs11077049 | G   | intron   | C__1225113_10  | +      | A/G     |
| 18         | 31632648  | rs4258695  | T   | intron   | C__26394825_20 | +      | G/T     |

<sup>1</sup> SNPs determined to be effective at classifying Qatari individuals as Q1, Q2 or Q3. These SNPs were selected based on maximum Q1 versus Q2 Fst, followed by maximum Fst between Q3 and the combined Q1+Q2 group for n=156 Qatari genotyped on the Affymetrix 5.0 array (see Methods for additional details on selection and validation). Shown is the chromosome, position on GRCh37 reference genome, dbSNP rsID, reference allele, function of the SNP based on location, TaqMan assay ID, strand genotyped by TaqMan assay, alleles reported by TaqMan assay.
