# Supplementary material for: Exome Sequencing of Only Seven Qataris Identifies Potentially Deleterious Variants in the Qatari Population
Source: PubMed Central journal article supplement (PMC3490971; doi:10.1371/journal.pone.0047614), 2012-11-06
Supplement: pone.0047614.s006.pdf [file pone.0047614.s006.pdf]

**Table S4. Allele frequency correlation between small and large samples<sup>1</sup>**

| Group <sup>2</sup>                           | Population code | Small sample | Large sample | Pearson Correlation <sup>3</sup> |
|----------------------------------------------|-----------------|--------------|--------------|----------------------------------|
| World mix 1                                  | CEU + CHB + YRI | 7            | 193          | 0.85                             |
| World mix 2                                  | TSI + ASW + JPT | 7            | 193          | 0.86                             |
| Africa                                       | LWK             | 7            | 48           | 0.88                             |
| African-American                             | ASW             | 7            | 48           | 0.88                             |
| Africa                                       | YRI             | 7            | 48           | 0.89                             |
| Qatar                                        | QTR             | 7            | 149          | 0.89*                            |
| Central America                              | MXL             | 7            | 48           | 0.90                             |
| Africa                                       | AFR             | 7            | 48           | 0.90                             |
| Central America / Caribbean                  | CLM + PUR + MXL | 7            | 193          | 0.90                             |
| Central America, Caribbean, African-American | AMR             | 7            | 193          | 0.90                             |
| Caribbean                                    | PUR             | 7            | 48           | 0.90                             |
| Asia                                         | CHB             | 7            | 48           | 0.91                             |
| Central America / Caribbean                  | CLM             | 7            | 48           | 0.91                             |
| America                                      | CEU             | 7            | 48           | 0.91                             |
| Europe                                       | FIN             | 7            | 48           | 0.91                             |
| Europe                                       | GBR             | 7            | 48           | 0.91                             |
| Europe                                       | TSI             | 7            | 48           | 0.91                             |
| Asia                                         | JPT             | 7            | 48           | 0.91                             |
| Asia                                         | CHS             | 7            | 48           | 0.91                             |
| Europe                                       | FIN + TSI + GBR | 7            | 174          | 0.92                             |
| Europe                                       | EUR             | 7            | 193          | 0.92                             |
| Asia                                         | ASN             | 7            | 193          | 0.92                             |

<sup>1</sup>In order to compare the allele frequency between small and large samples, genotypes for 20,381 deleterious missense coding SNPs were obtained for 7 Qatari and 1,092 exomes from Europe, Asia, Africa, and the Americas (Table S3). Seven random individuals were selected from each population group the allele frequency was compared to a larger independent sample of the same group. Pearson product-moment correlation was calculated for each group.

<sup>2</sup>Groups include each population and continent from Table S2, as well as larger groups combining populations. Combinations include two “World mix” populations combining 3 Europeans, 2 Asians and 2 Africans, a mix of populations from Central America and the Caribbean (3 Colombians, 2 Puerto Ricans, and 2 Mexicans), and a mix of European populations (3 Finnish, 2 British and 2 Tuscans).

<sup>3</sup>Pearson product-moment correlation was calculated using 20,381 SNPs for 1000G populations and using 131 Affymetrix 5.0 SNPs for the Qatari(\*).
