# Supplementary material for: Exome Sequencing of Only Seven Qataris Identifies Potentially Deleterious Variants in the Qatari Population
Source: PLoS One. 2012 Nov 6;7(11):e47614. doi: 10.1371/journal.pone.0047614 (PMC3490971; doi:10.1371/journal.pone.0047614)
Supplement: Table S2 — Ancestry proportion, sequencing and coverage of seven Qatari exomes. (PDF) [file pone.0047614.s004.pdf]

**Table S2. Qatari Population Cluster Ancestry Proportions of Samples Selected for Targeted Exome Sequencing<sup>1</sup>**

| Sample information <sup>2</sup> |                           |        | Proportion of ancestry in population cluster <sup>3</sup> |                        |            | Mapping to target exons $\pm$ 500bp <sup>4</sup> |              |               | Coverage <sup>6</sup> |                      |
|---------------------------------|---------------------------|--------|-----------------------------------------------------------|------------------------|------------|--------------------------------------------------|--------------|---------------|-----------------------|----------------------|
| Qatari population cluster       | Sample ID (Flowcell_Lane) | Gender | Bedouin Q1                                                | Persian/South Asian Q2 | African Q3 | Read length                                      | Reads mapped | Bases mapped  | Depth                 | Breadth <sup>7</sup> |
| Q1                              | Q1_1 (101215_8)           | M      | 0.97                                                      | 0.023                  | 0.007      | 124                                              | 16,221,148   | 2,011,422,389 | 64                    | 31,428,475           |
| Q1                              | Q1_2 (101215_7)           | M      | 0.998                                                     | 0.001                  | 0.001      | 124                                              | 9,428,965    | 1,169,191,657 | 37                    | 31,599,775           |
| Q1                              | Q1_3 (100830_6)           | F      | 0.668                                                     | 0.319                  | 0.013      | 105                                              | 13,274,630   | 1,393,836,173 | 44                    | 31,678,095           |
| Q2                              | Q2_1 (101215_6)           | F      | 0.41                                                      | 0.589                  | 0          | 124                                              | 9,263,742    | 1,148,704,026 | 37                    | 31,046,055           |
| Q2                              | Q2_2 (100830_5)           | F      | 0.41                                                      | 0.584                  | 0.006      | 105                                              | 13,551,738   | 1,422,932,508 | 45                    | 31,620,722           |
| Q3                              | Q3_1 (101215_5)           | M      | 0.07                                                      | 0.021                  | 0.909      | 124                                              | 7,674,052    | 951,582,502   | 30                    | 31,719,417           |
| Q3                              | Q3_2 (100830_3)           | F      | 0.175                                                     | 0.271                  | 0.555      | 105                                              | 14,411,946   | 1,513,254,319 | 48                    | 31,526,132           |
|                                 | Mean                      |        | 0.52                                                      | 0.26                   | 0.21       | 116                                              | 11,975,174   | 1,372,989,082 | 44                    | 31,516,953           |

<sup>1</sup> Individuals selected for sequencing from three Qatari population clusters, including n=3 from Q1, n=2 from Q2, and n=2 from Q3; see Figure S1.

<sup>2</sup> Sample information includes population cluster, sample id, flowcell and lane id, gender.

<sup>3</sup> Proportion of Q1, Q2, and Q3 admixture determined using STRUCTURE [2]. Samples ordered from top-to-bottom by population cluster, then by decreasing proportion of Bedouin (Q1) admixture (see text re nomenclature).

<sup>4</sup> One paired-end Illumina library was generated for each exome enriched using the Agilent SureSelect 30MB hybrid capture [4] in a single Illumina GAIIx lane. Samples were sequenced in two separate flow cells, the first run of paired-end read length 124 bp and the second of paired-end read length 105 bp. An average of 27 million paired-end reads were sequenced per exome and an average of 28 million were mapped to the GRCh37 human reference genome assembly using BWA 0.5.9 [5] with mapping parameters “-q 15 -t 8 -o 1 -k 2 -i 15 -e -1 -l 32” and a maximum insert size of 1,000. Duplicate reads were removed using SAMtools 0.1.18 [6]. Reads mapping within 500 bp of a target exon were extracted. Shown is the read length, the number of reads mapped after filtering within 500bp  $\pm$  of a target exon, and the number of bases mapped (read length X number of reads).

<sup>5</sup> Coverage depth after quality filtering was compared for each sequenced exome using GATK [106]. Quality filtering included (in order) removal of reads not mapping in proper pairs, removal of duplicate reads, removal of reads mapped beyond 500 bp  $\pm$  of a target exon. Additional quality filtering included identification of and realignment across indels, recalibration of base quality scores, clipping of read ends with quality below 5 and reads with mapping quality 0. Only bases with quality above 20 in reads with mapping quality above 0 were counted in the coverage analysis. Coverage depth (bases mapped / sequence length) in coding exons as defined by the Consensus Coding Project (CCDS [8]). Coverage breadth is an estimate of the sequenced exome size in bp, defined here as bases mapping to target exons  $\pm$  500 bp divided by depth.
