# Supplementary material for: Exome Sequencing of Only Seven Qataris Identifies Potentially Deleterious Variants in the Qatari Population
Source: PLoS One. 2012 Nov 6;7(11):e47614. doi: 10.1371/journal.pone.0047614 (PMC3490971; doi:10.1371/journal.pone.0047614)
Supplement: Table S3 — Population samples from 1000 Genomes Project Phase 1. (PDF) [file pone.0047614.s005.pdf]

**Table S3. Population Samples from 1000 Genomes Project Phase 1<sup>1</sup>**

| Continent of origin | Population description                                                            | Code | n     | 2n    |
|---------------------|-----------------------------------------------------------------------------------|------|-------|-------|
| Europe              | TSI + CEU + GBR + FIN                                                             | EUR  | 379   | 758   |
|                     | Toscani in Italy                                                                  | TSI  | 98    | 196   |
|                     | Finnish from Finland                                                              | FIN  | 93    | 186   |
|                     | British from England and Scotland                                                 | GBR  | 89    | 178   |
|                     | Utah residents (CEPH) with Northern and Western European ancestry                 | CEU  | 85    | 170   |
|                     | Iberian in Spain                                                                  | IBS  | 14    | 28    |
| Asia                | CHS + CHB + JPT                                                                   | ASN  | 286   | 572   |
|                     | Han Chinese South                                                                 | CHS  | 100   | 200   |
|                     | Han Chinese in Beijing, China                                                     | CHB  | 97    | 194   |
|                     | Japanese in Tokyo, Japan                                                          | JPT  | 89    | 178   |
| Africa              | YRI + LWK                                                                         | AFR  | 185   | 370   |
|                     | Luhya in Webuye, Kenya                                                            | LWK  | 97    | 194   |
|                     | Yoruba in Ibadan, Nigeria                                                         | YRI  | 88    | 176   |
| The Americas        | ASW + MXL + PUR                                                                   | AMR  | 242   | 484   |
|                     | Mexican Ancestry in Los Angeles, CA                                               | MXL  | 66    | 132   |
|                     | African Ancestry in Southwest US                                                  | ASW  | 61    | 122   |
|                     | Colombian in Medellin, Colombia                                                   | CLM  | 60    | 120   |
|                     | Puerto Rican in Puerto Rico                                                       | PUR  | 55    | 110   |
| Total               | TSI + CEU + GBR + FIN + IBS + CHS + CHB + JPT + YRI + LWK + ASW + MXL + CLM + PUR | ALL  | 1,092 | 2,184 |

<sup>1</sup>In order to compare allele frequency between Qatari and 1000 Genomes Project populations, individuals from 12 populations sampled in four continents (Europe, Asia, Africa, America) by the 1000 Genomes Project Consortium were clustered by continent of origin. The analysis includes genotypes in exonic SNPs for (n=1,092) individuals included in the October 2011 Integrated Phase 1 Variant Set Release. Individuals were grouped by continent of origin (Europe, Asia, Africa, America). Shown is the continent, name, origin, code and size (individuals and alleles) for each population. From top-to-bottom continents and populations within each continent are ordered by decreasing sample size. Total (n=1,092) shown on bottom line.
